# Supplementary material
Source: HighWire-hosted journal article supplement (https://bmjopen.bmj.com/content/9/10/e032888)
Supplement: inline-supplementary-material-1 [file inline-supplementary-material-1.pdf]

**Appendix 1. Incidence rates of first hospital admission/first visit to inpatient/outpatient care due to AUD among youths, between 2009 and 2016. N = 485 839.**

| Labour market attachment         | N       | AUD   | Core workforce        | Education            | Insecure workforce    | NEET                  |
|----------------------------------|---------|-------|-----------------------|----------------------|-----------------------|-----------------------|
|                                  |         |       | IR 95% CI             | IR 95% CI            | IR 95% CI             | IR 95% CI             |
|                                  |         |       | 155.5 (147.9–163.4)   | 127.9 (121.2–135.1)  | 217.7 (207.1–228.7)   | 171.8 (148.3–198.9)   |
| <i>Core workforce</i>            | 166 817 | 1 547 |                       |                      |                       |                       |
| <i>Education</i>                 | 177 464 | 1 338 |                       |                      |                       |                       |
| <i>Insecure workforce</i>        | 123 917 | 1 561 |                       |                      |                       |                       |
| <i>NEET</i>                      | 17 641  | 178   |                       |                      |                       |                       |
| <b>Origin</b>                    |         |       |                       |                      |                       |                       |
| <i>Native Swedish</i>            | 375 667 | 3 478 | 149.8 (141.7–158.4)   | 123.8 (116.3–131.9)  | 214.1 (202.1–226.9)   | 185.0 (155.8–219.6)   |
| <i>Migrants' offspring</i>       | 73 202  | 835   | 205.7 (181.6–233.0)   | 143.3 (126.3–162.5)  | 262.7 (235.2–293.5)   | 173.9 (124.3–243.4)   |
| <i>Youth migrant</i>             | 36 804  | 310   | 128.9 (101.3–164.1)   | 134.9 (113.1–160.8)  | 164.9 (136.4–199.3)   | 98.7 (57.3–169.9)     |
| <b>Sex</b>                       |         |       |                       |                      |                       |                       |
| <i>Male</i>                      | 248 390 | 2 581 | 167.6 (157.7–178.2)   | 136.1 (125.6–147.4)  | 236.2 (220.8–252.7)   | 218.6 (181.7–263.1)   |
| <i>Female</i>                    | 237 449 | 2 043 | 136.1 (124.9–148.3)   | 122.1 (113.5–131.2)  | 199.4 (185.3–214.5)   | 125.9 (99.0–160.4)    |
| <b>Age* (years)</b>              |         |       |                       |                      |                       |                       |
| <i>19</i>                        | 414 106 | 3 577 | 142.5 (134.6–150.7)   | 118.7 (111.9–125.9)  | 198.6 (187.5–210.5)   | 149.6 (124.9–179.1)   |
| <i>20</i>                        | 55 653  | 802   | 221.7 (196.5–250.3)   | 215.9 (187.4–248.7)  | 291.5 (260.7–326.1)   | 230.9 (169.9–313.6)   |
| <i>21</i>                        | 10 882  | 158   | 256.7 (198.4–331.9)   | 181.4 (122.6–268.4)  | 273.2 (214.3–348.4)   | 223.4 (120.2–415.2)   |
| <i>22</i>                        | 3 505   | 50    | 210.7 (124.8–355.8)   | 143.9 (68.6–302.1)   | 381.4 (265.1–548.9)   | 231.6 (86.9–617.5)    |
| <i>23</i>                        | 1 108   | 20    | 226.1 (94.1–543.3)    | 109.3 (27.3–437.1)   | 379.7 (197.6–729.8)   | 844.3 (316.9–2 249.5) |
| <i>24</i>                        | 585     | 13    | 418.5 (174.2–1 005.5) | 256.9 (64.2–1 027.2) | 483.1 (201.1–1 160.7) | 359.2 (50.6–2 549.7)  |
| <b>Domicile</b>                  |         |       |                       |                      |                       |                       |
| <i>Large cities</i>              | 157 456 | 2 039 | 229.9 (213.7–247.5)   | 160.8 (148.9–173.7)  | 283.0 (262.5–306.1)   | 275.6 (219.1–346.6)   |
| <i>Medium-sized towns</i>        | 236 275 | 1 937 | 123.6 (113.3–134.9)   | 103.7 (94.9–113.3)   | 197.5 (181.8–214.4)   | 176.9 (137.6–227.4)   |
| <i>Smaller towns/rural areas</i> | 79 449  | 613   | 117.6 (105.5–131.2)   | 118.6 (103.1–136.5)  | 176.5 (158.4–196.7)   | 167.8 (122.1–293.9)   |

Age\* (Completed secondary education). AUD: Alcohol use disorder; CI: Confidence interval; IR: Incidence rate per 100.000 person years; N: Population; NEET: Not in Education, Employment, or Training.

**Appendix 2. Cox regression models for first hospital admission/first visit to inpatient/outpatient care due to AUD, by domicile of residence among youths (male and female) between 2009 and 2016. N = 94 700.**

| Labour market attachment            | N      | AUD | HR 95% CI, Model 1 | HR 95% CI, Model 2 |
|-------------------------------------|--------|-----|--------------------|--------------------|
| <b>a) Large cities</b>              |        |     |                    |                    |
| <i>Core workforce</i>               | 51 766 | 716 | ref                | ref                |
| <i>Education</i>                    | 67 431 | 646 | 0.74 (0.66–0.83)   | 0.75 (0.67–0.84)   |
| <i>Insecure workforce</i>           | 39 051 | 652 | 1.23 (1.11–1.37)   | 1.24 (1.12–1.39)   |
| <i>NEET</i>                         | 4 316  | 73  | 1.17 (0.92–1.49)   | 1.20 (0.94–1.53)   |
| <b>b) Medium-sized towns</b>        |        |     |                    |                    |
| <i>Core workforce</i>               | 67 088 | 500 | ref                | ref                |
| <i>Education</i>                    | 79 802 | 491 | 0.86 (0.76–0.98)   | 0.87 (0.77–0.99)   |
| <i>Insecure workforce</i>           | 48 711 | 565 | 1.56 (1.38–1.76)   | 1.57 (1.39–1.78)   |
| <i>NEET</i>                         | 5 692  | 61  | 1.38 (1.05–1.79)   | 1.39 (1.06–1.81)   |
| <b>c) Smaller towns/rural areas</b> |        |     |                    |                    |
| <i>Core workforce</i>               | 45 748 | 324 | ref                | ref                |
| <i>Education</i>                    | 27 820 | 195 | 1.08 (0.90–1.29)   | 1.07 (0.89–1.29)   |
| <i>Insecure workforce</i>           | 31 743 | 327 | 1.49 (1.27–1.74)   | 1.48 (1.27–1.73)   |
| <i>NEET</i>                         | 3 736  | 38  | 1.36 (0.97–1.90)   | 1.36 (0.96–1.89)   |

**AUD: Alcohol use disorder; CI: Confidence interval; HR: Hazard ratio; N: Population; NEET: Not in Education, Employment, or Training.**

Model 1: adjusted for sex and age

Model 2: adjusted fo
